# Supplementary material
Source: PubMed Central journal article supplement (PMC6122660)
Supplement: ry172326suppa1.pdf [file ry172326suppa1.pdf]

**Figure E1:** Breast Cancer Screening Cohort Selection Pathway Using a 60-day Diagnostic Window for Positive Screening Results: 2012 Medicare Beneficiaries.

**Table E1: Definitions of Health Care Categories Used in the Analysis by Code Type**

| Health Care Category                   | CTP/HCPCS                                                                          | ICD-9 CM                              |
|----------------------------------------|------------------------------------------------------------------------------------|---------------------------------------|
| Screening Mammography                  | 76092,77057, G0202                                                                 | V76.11, V76.12                        |
| Diagnostic Mammography                 | 76082, 76090, 76091, 77051, 77055, 77056, G0204, G0206                             |                                       |
| Breast Ultrasound                      | 76645                                                                              |                                       |
| Papanicolaou Test                      | G0123, G0141, G0144, G0145, G0147, G0148, P3000, P3001, Q0091                      | V72.31, V76.2, V76.47, V76.49, V15.89 |
| Screening Pelvic Physical Examinations | G0101                                                                              |                                       |
| Mastectomy                             | 19160, 19162, 19180, 19182, 19200, 19220, 19240, 19301–19307                       | 85.41–85.48                           |
| Breast Cancer                          |                                                                                    | 233.0, 174, V10.3                     |
| Welcome-to-Medicare Visit (WMV)        | G0344, G0402                                                                       |                                       |
| Annual Wellness Visit (AWV)            | G0438, G0439                                                                       |                                       |
| Bone Mass Measurements                 | 76977, 77078, 77079, 77080, 77081, 77083, G0130                                    |                                       |
| Seasonal Influenza Virus Vaccine       | 90655, 90656, 90657, 90658, 90660, 90662, Q2034, Q2035, Q2036, Q2037, Q2038, Q2039 |                                       |

**Table E2: Comparison of Adjusted Odds Ratio Estimates by Time Frame for Positive Screening Results**

|                                 | 30-Day Window for Diagnostic Evaluation |                       |                   | 60-Day Window for Diagnostic Evaluation |                       |                   |
|---------------------------------|-----------------------------------------|-----------------------|-------------------|-----------------------------------------|-----------------------|-------------------|
|                                 | Papanicolaou Test                       | Bone Mass Measurement | Influenza Vaccine | Papanicolaou Test                       | Bone Mass Measurement | Influenza Vaccine |
| Overall Sample                  |                                         |                       |                   |                                         |                       |                   |
| Positive vs No Screen           | 1.61 [1.47, 1.77]                       | 1.89 [1.79, 2.01]     | 1.62 [1.49, 1.76] | 1.63 [1.49, 1.78]                       | 1.87 [1.77, 1.98]     | 1.62 [1.50, 1.75] |
| Negative vs No Screen           | 1.63 [1.57, 1.69]                       | 1.69 [1.65, 1.73]     | 1.64 [1.59, 1.69] | 1.63 [1.57, 1.68]                       | 1.68 [1.64, 1.72]     | 1.63 [1.59, 1.68] |
| Positive vs Negative            | 0.99 [0.90, 1.08]                       | 1.12 [1.06, 1.19]     | 0.99 [0.91, 1.07] | 1.00 [0.92, 1.09]                       | 1.11 [1.05, 1.18]     | 0.99 [0.92, 1.07] |
| Subgroup of Positive Screeners  |                                         |                       |                   |                                         |                       |                   |
| True-positive vs False-positive | 1.67 [1.29, 2.15]                       | 3.23 [2.77, 3.76]     | 0.97 [0.76, 1.23] | 1.60 [1.25, 2.04]                       | 3.23 [2.79, 3.74]     | 0.98 [0.79, 1.23] |
| False-positive vs True-negative | 0.93 [0.84, 1.03]                       | 0.94 [0.89, 1.01]     | 0.99 [0.90, 1.07] | 0.95 [0.87, 1.05]                       | 0.94 [0.89, 1.00]     | 0.99 [0.91, 1.07] |
